# Supplementary material
Source: PubMed Central journal article supplement (PMC4325598)

## Supporting Information

### **Differential Stabilities and Sequence-Dependent Base Pair Opening Dynamics of Watson-Crick Base Pairs with 5-Hydroxymethylcytosine, 5-Formylcytosine, or 5-Carboxylcytosine**

Marta W. Szulik<sup>1\*</sup>, Pradeep S. Pallan<sup>2</sup>, Boguslaw Nocek<sup>3</sup>, Markus Voehler<sup>1</sup>, Surajit Banerjee<sup>4</sup>, Sonja C. Brooks<sup>5</sup>, Andrzej Joachimiak<sup>3</sup>, Martin Egli<sup>2</sup>, Brandt F. Eichman<sup>5</sup>, and Michael P. Stone<sup>1\*</sup>

<sup>1</sup>Department of Chemistry, Vanderbilt Institute of Chemical Biology, Vanderbilt Ingram Cancer Center, and Center for Structural Biology, Vanderbilt University, Nashville, TN 37235

<sup>2</sup>Department of Biochemistry, Vanderbilt Institute of Chemical Biology, and Center for Structural Biology, School of Medicine, Vanderbilt University, Nashville, TN 37232

<sup>3</sup>Bioscience Division, Argonne National Laboratory, Argonne, IL 60439

<sup>4</sup>Northeastern Collaborative Access Team and Department of Chemistry and Chemical Biology, Cornell University, Argonne National Laboratory, Argonne, IL 60439

<sup>5</sup>Department of Biological Sciences, Vanderbilt Institute of Chemical Biology, and Center for Structural Biology, Vanderbilt University, Nashville, TN 37235

To whom correspondence should be addressed:

[michael.p.stone@vanderbilt.edu](mailto:michael.p.stone@vanderbilt.edu)

**Table of Contents**

|                   |                                                                                                                                                                                                                                    |   |
|-------------------|------------------------------------------------------------------------------------------------------------------------------------------------------------------------------------------------------------------------------------|---|
| <b>Table S1.</b>  | Crystallization conditions for the DDD <sup>hm</sup> , DDD <sup>f</sup> and DDD <sup>ca</sup> duplexes.                                                                                                                            | 3 |
| <b>Figure S1.</b> | Temperature dependence of line widths of the imino proton resonances of the DDD, DDD <sup>m</sup> , DDD <sup>hm</sup> , DDD <sup>f</sup> and DDD <sup>ca</sup> duplexes.                                                           | 4 |
| <b>Figure S2.</b> | Modification site of the DDD <sup>hm</sup> displaying dual conformers of the 5hmC modified base and its interactions with surrounding waters and residues.                                                                         | 7 |
| <b>Figure S3.</b> | Modification site of the DDD <sup>hm</sup> displaying interactions between the modified 5hmC and 3'-flanking G <sup>22</sup> through water molecules.                                                                              | 8 |
| <b>Figure S4.</b> | Expanded plots from the aromatic-anomeric region of the NOESY spectra, depicting sequential NOE connectivities of (A) DDD, (B) DDD <sup>m</sup> , (C) DDD <sup>hm</sup> , (D) DDD <sup>f</sup> and (E) DDD <sup>ca</sup> duplexes. | 9 |

**Table S1.** Crystallization conditions.

| Condition                      | DDD <sup>hm</sup>                   | DDD <sup>f</sup>    | DDD <sup>ca</sup>       |
|--------------------------------|-------------------------------------|---------------------|-------------------------|
| pH                             | 7.0                                 | 6.0                 | 6.0                     |
| Buffer                         | 40 mM Na Cacodylate                 | 40 mM Na Cacodylate | 40 mM Na Cacodylate     |
| Salts                          | 80 mM NaCl, 20 mM MgCl <sub>2</sub> | 80 mM NaCl          | 80 mM SrCl <sub>2</sub> |
| Additives                      | 12 mM spermine 4HCl                 | 12 mM spermine 4HCl | 12 mM spermine 4HCl     |
| 2-methyl-2,4-pentanediol (MPD) | 10 % (v/v)                          | 10 % (v/v)          | 10 % (v/v)              |

**Figure S1.** Temperature dependence of line widths of the imino proton resonances of the (A) DDD, (B) DDD<sup>m</sup>, (C) DDD<sup>hm</sup>, (D) DDD<sup>f</sup> and (E) DDD<sup>ca</sup> duplexes.

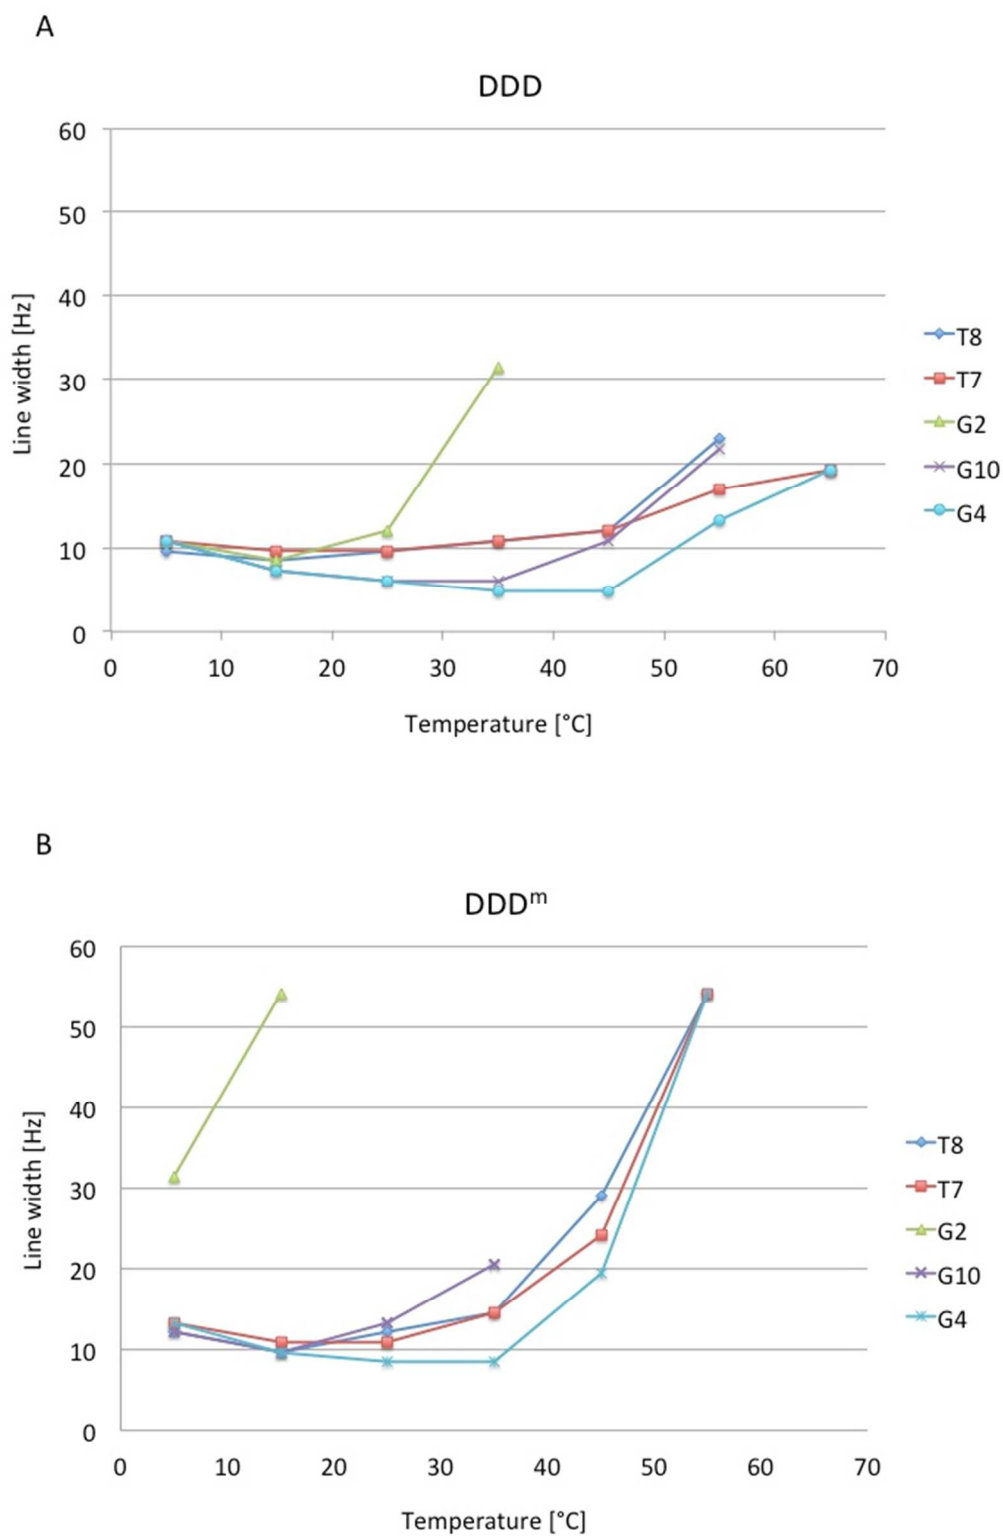

C

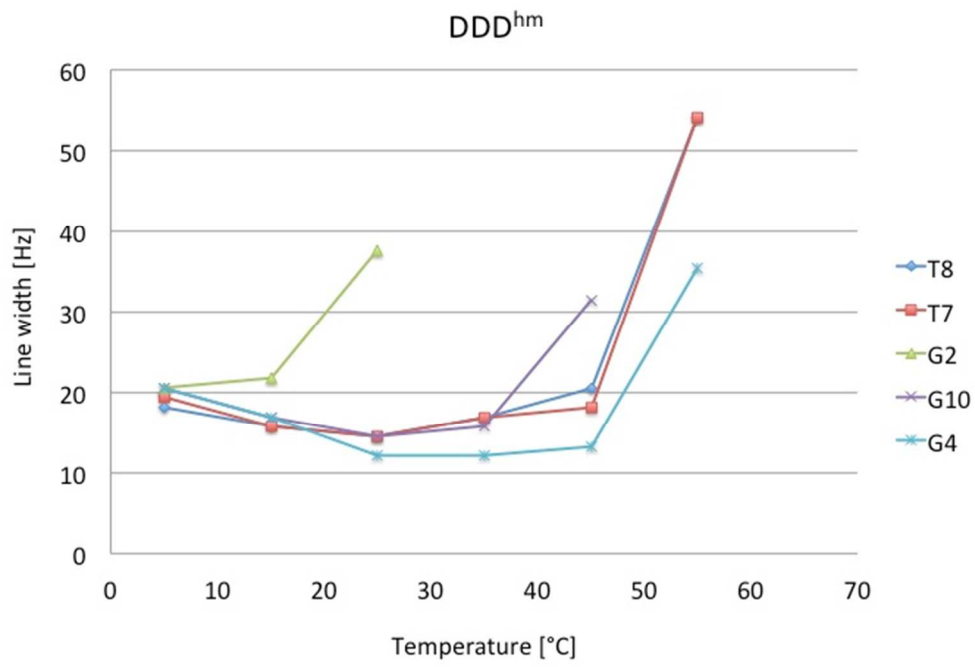

D

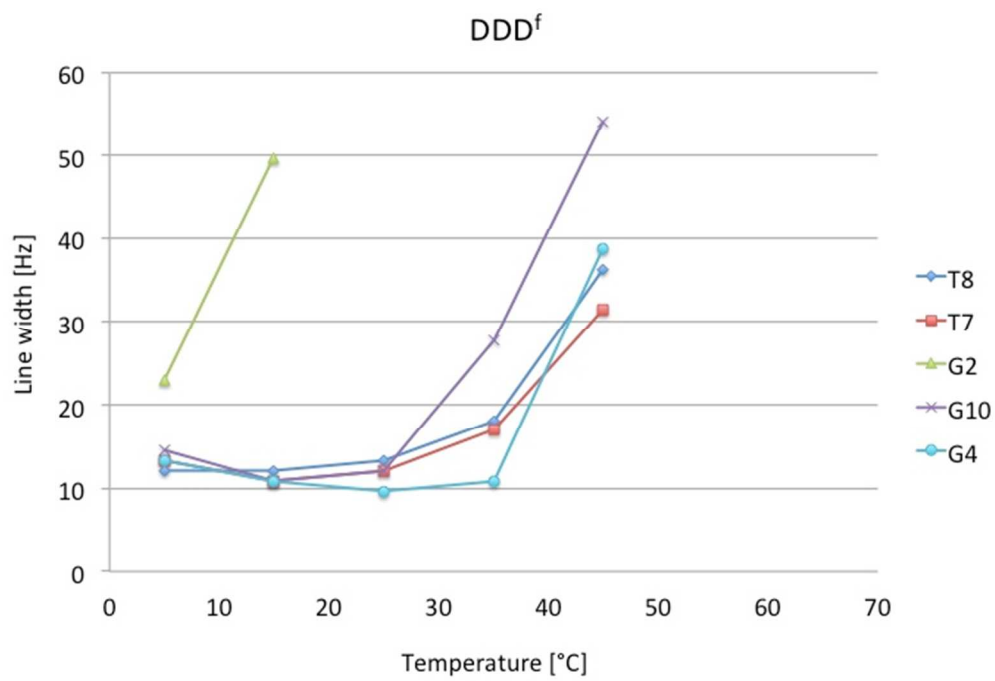

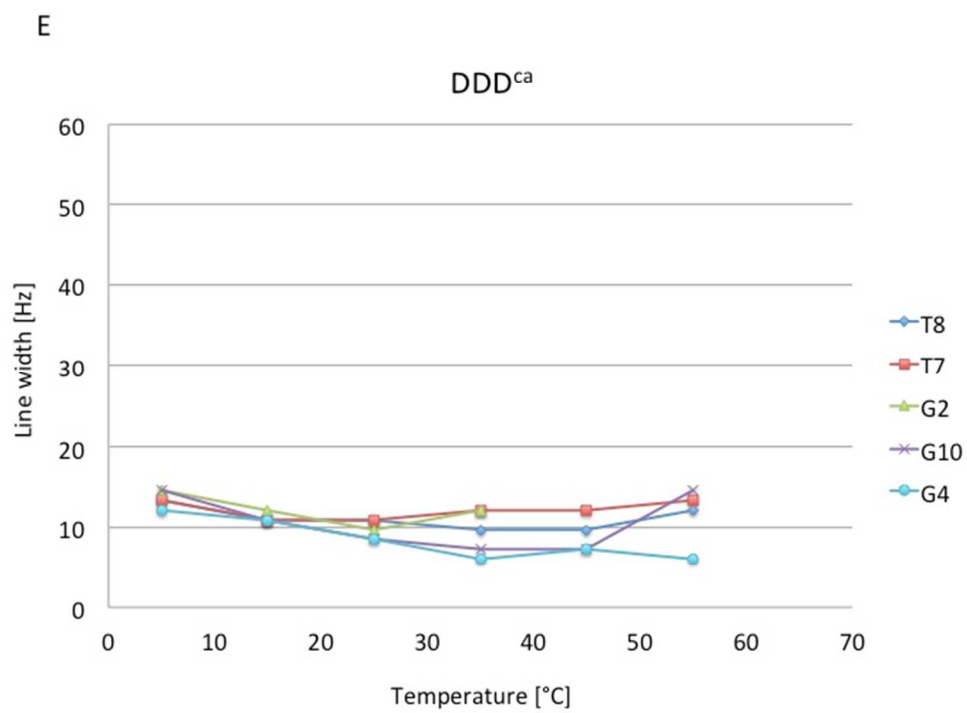

**Figure S2.** Modification site of the DDD<sup>hm</sup> displaying dual conformers of the 5hmC modified base and its interactions with surrounding waters and residues.

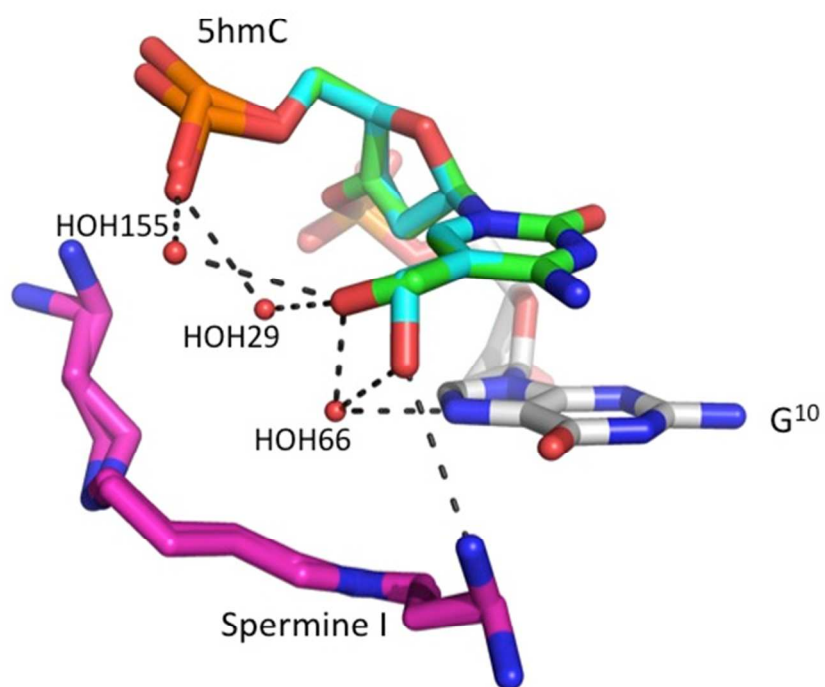

**Figure S3.** Modification site of the DDD<sup>hm</sup> displaying interactions between the modified 5hmC and 3'-flanking G<sup>22</sup> through water molecules.

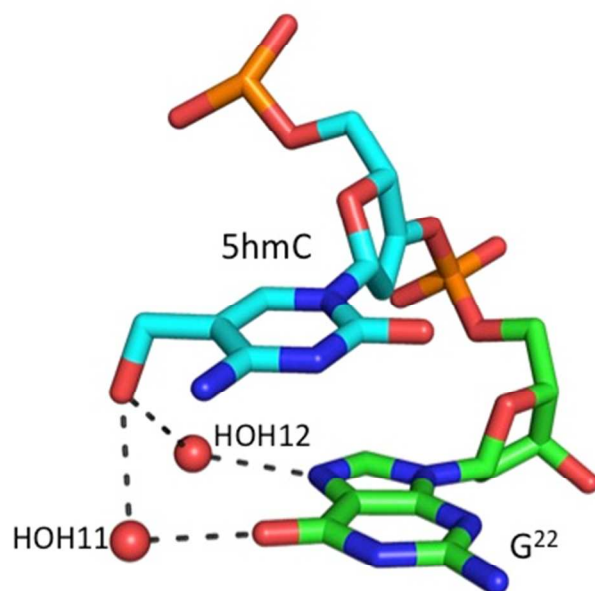



**Figure S4.** Expanded plots from the aromatic-anomeric region of the NOESY spectra, depicting sequential NOE connectivities of (A) DDD, (B) DDD<sup>m</sup>, (C) DDD<sup>hm</sup>, (D) DDD<sup>f</sup> and (E) DDD<sup>ca</sup> duplexes.

Data were collected at 900 MHz.

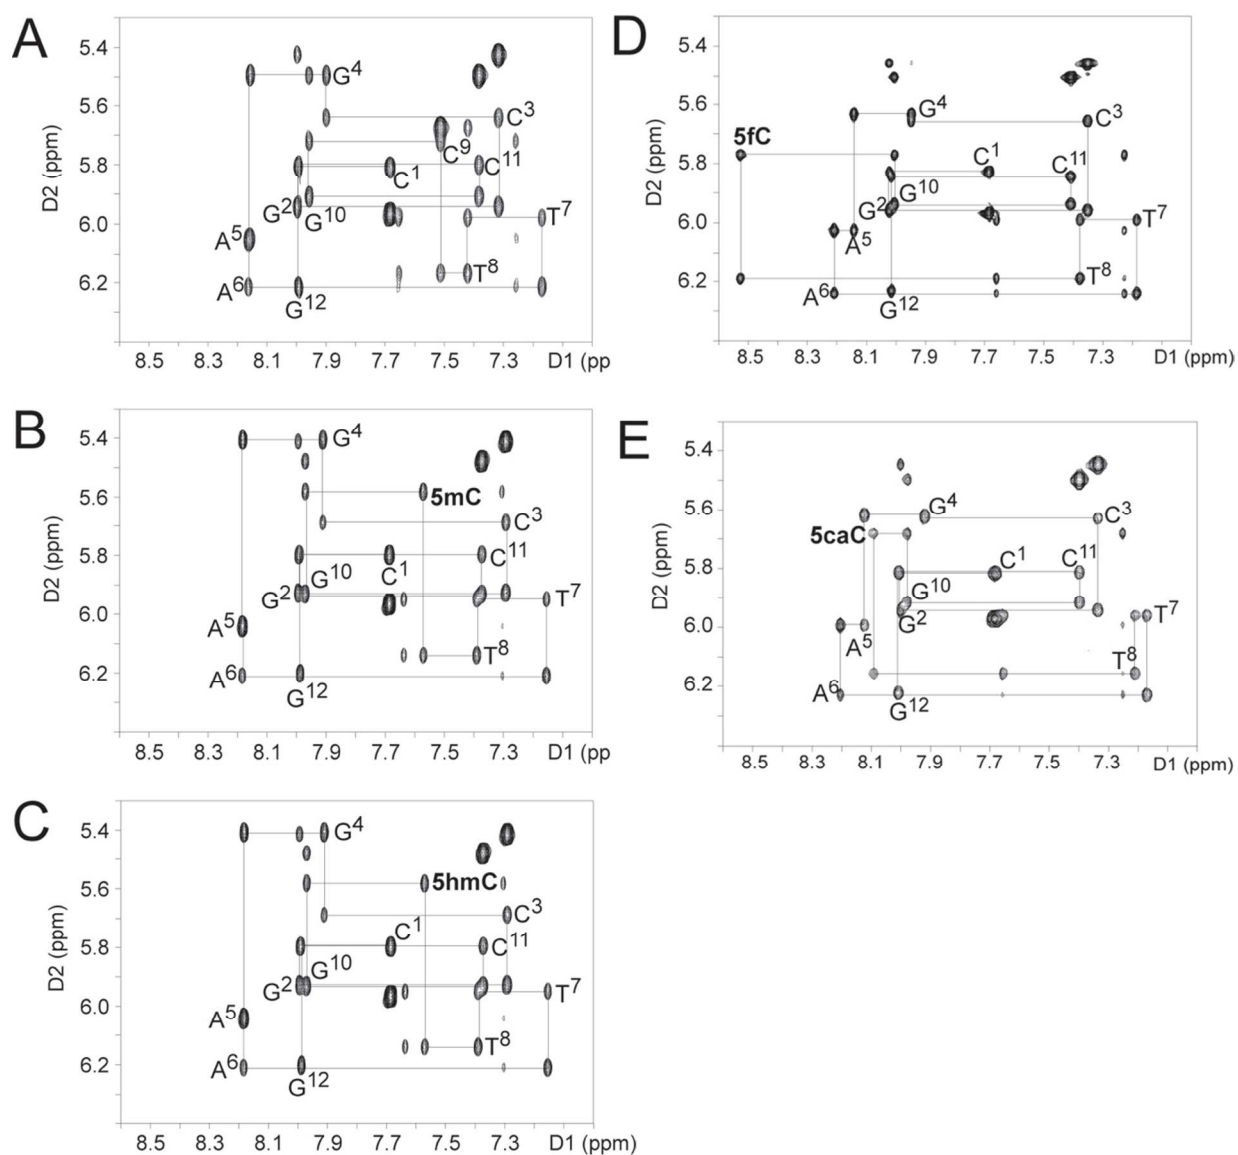

Supplement: bi501534x_si_001.pdf [file bi501534x_si_001.pdf]
